# Supplementary material for: The cell wall-localized atypical β-1,3 glucanase ZERZAUST controls tissue morphogenesis in Arabidopsis thaliana
Source: Oxford University Press journal article supplement (doi:10.1242/dev.152231), 2017-01-01
Supplement: dev152231supp.pdf [file dev152231supp.pdf]

## Supplemental Information

### Supplemental Figures

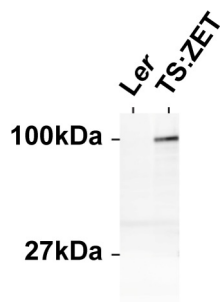

**Fig. S1. Western blot using an extract of 6-day *pZET::TS:ZET* *zet-1* seedlings probed with an anti-GFP antibody.** A single band is detected indicating an intact TS:ZET fusion protein. The observed molecular weight of the fusion protein (100 kDa) is larger than the expected one (80 kDa) suggesting posttranslational modification.

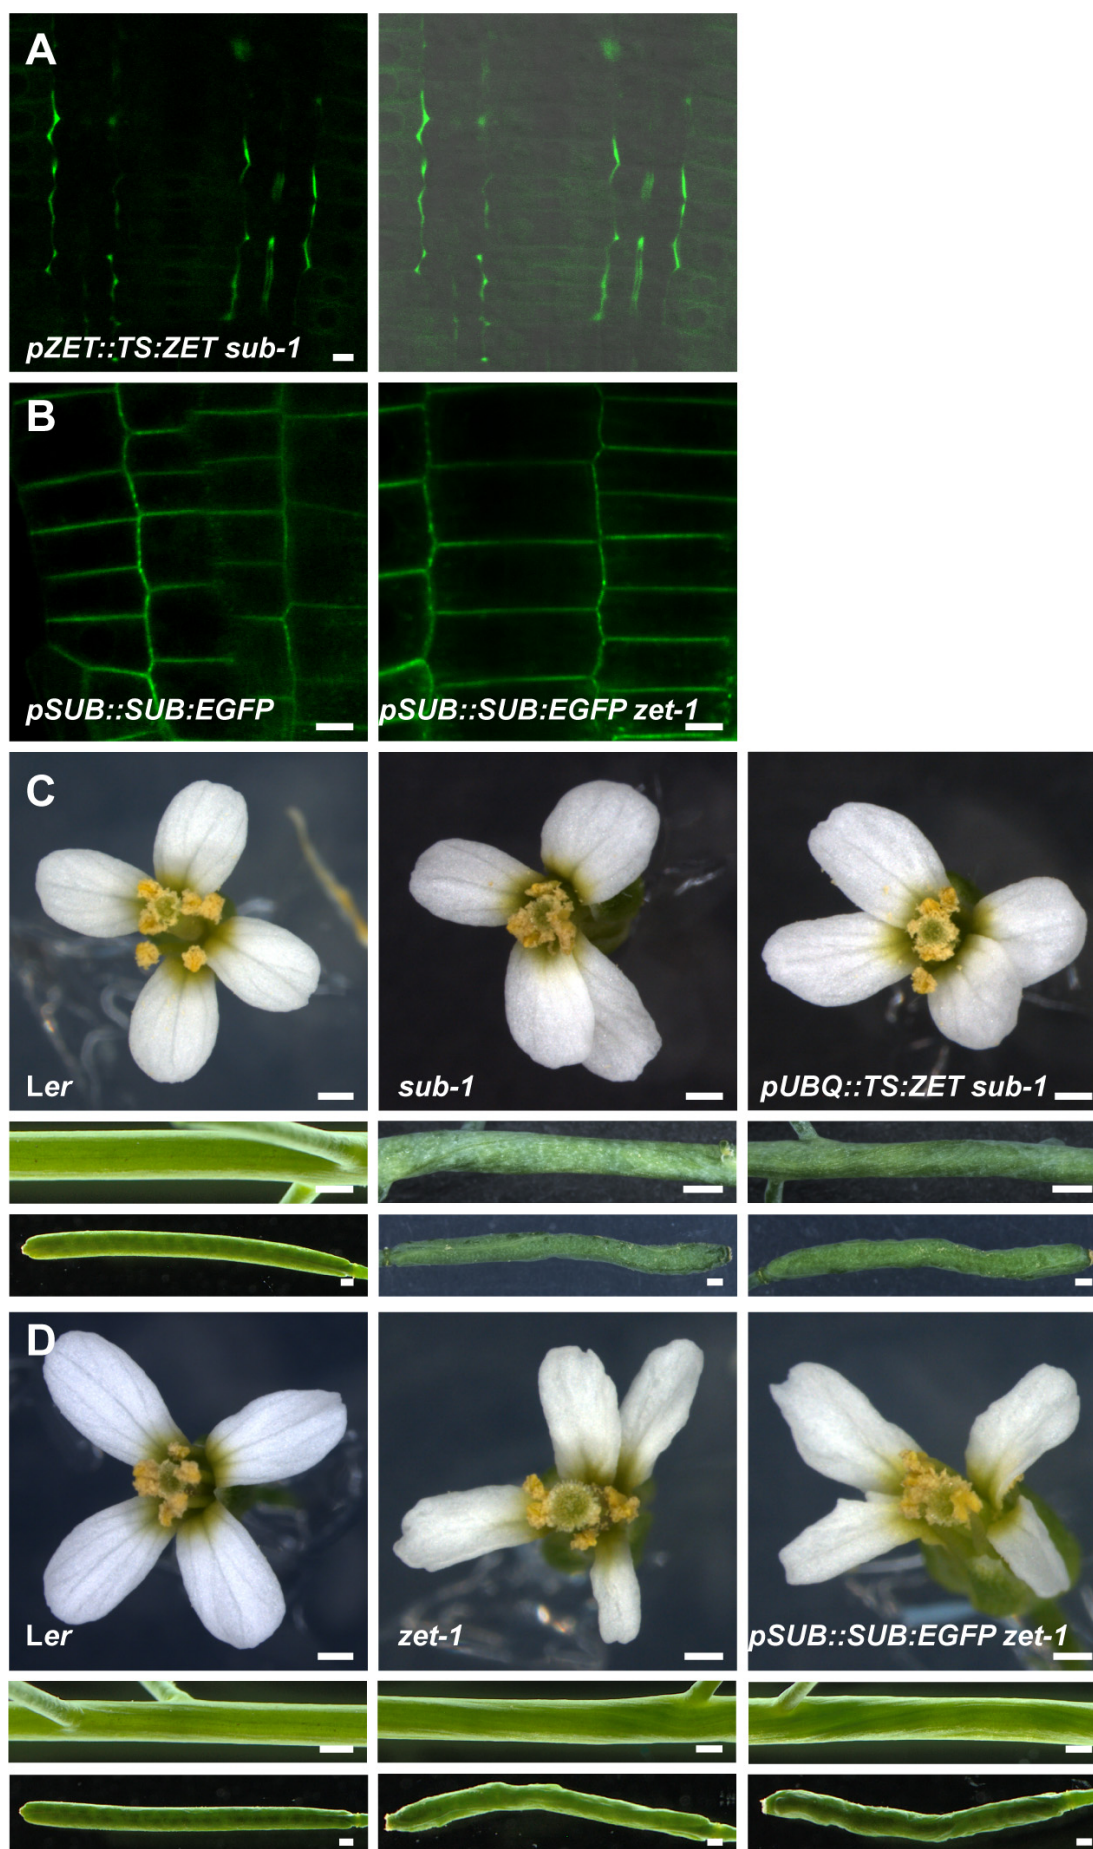

**Fig. S2. Analysis of TS:ZET and SUB:EGFP signal localization in different mutant backgrounds.** (A) and (B) Optical sections through the meristematic region of a 5-day root. (C) and (D) Upper panels: Stage 13 flower. Middle panel: Siliques. Bottom panel: Stem. Genotypes are indicated. (A) Note regular TS:ZET signal distribution in *sub-1* (compare with Fig. 3C). Right panel includes DIC channel. (B) The spotty SUB:EGFP signal is identical in wild type (left panel) and *zet-1* (right panel). (C) A functional *pUBQ::TS:ZET* transgene does not influence the *sub-1* phenotype. (D) A functional *pSUB::SUB:EGFP* transgene does not influence the *zet-1* phenotype. Abbreviations: DIC, differential interference contrast. Scale bars: 10  $\mu\text{m}$ .

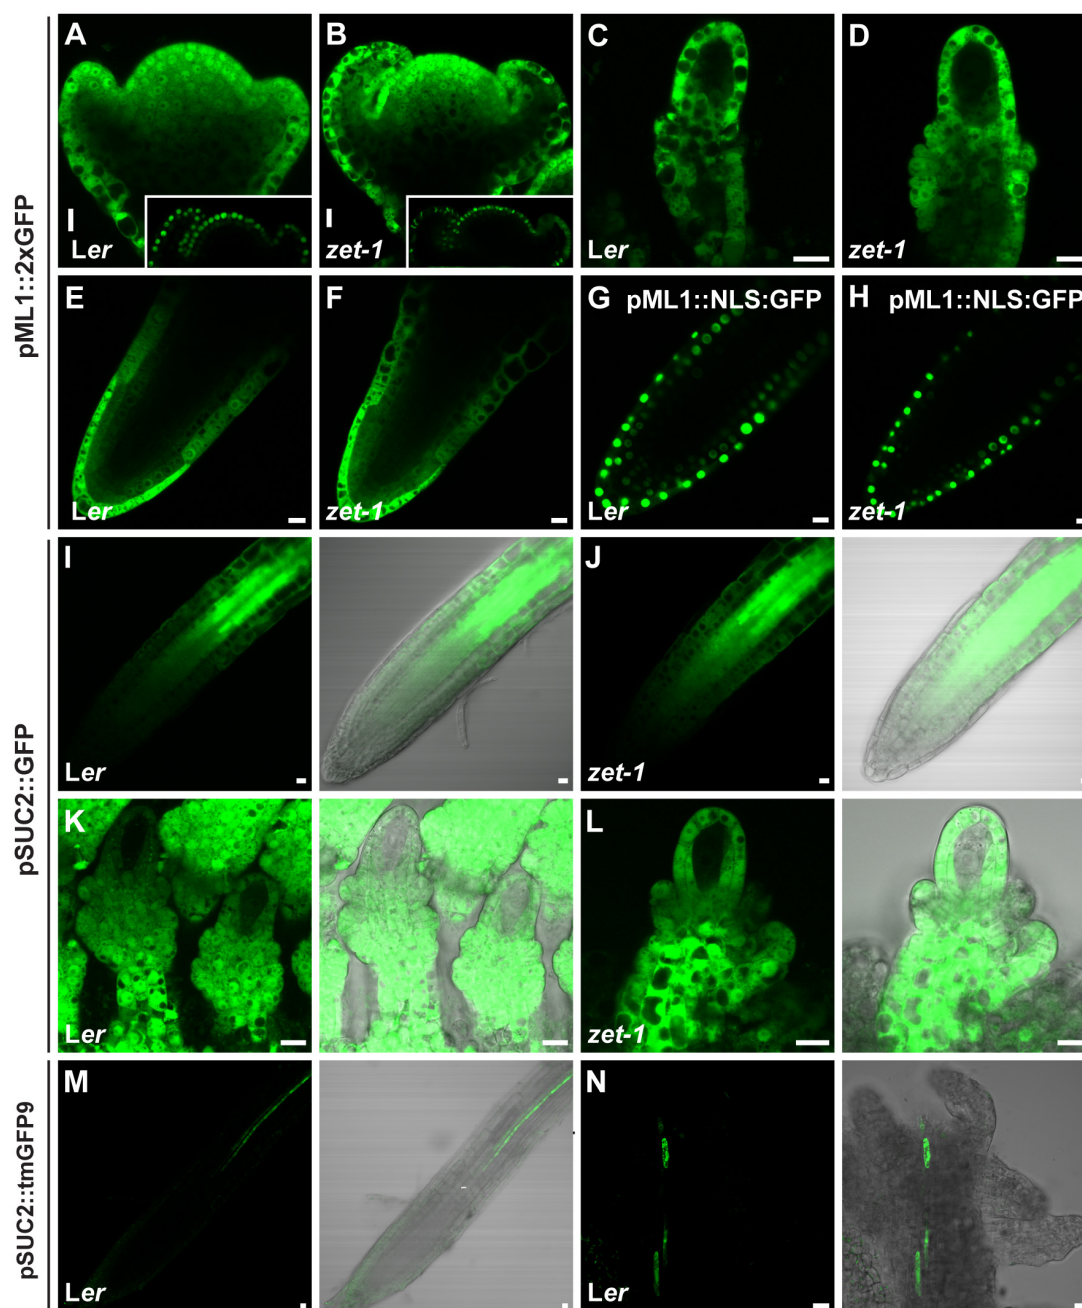

**Fig. S3. Inter-cell layer movement of GFP in *Ler* and *zet-1*.** Longitudinal confocal micrographs of tissue expressing the pML1::2xGFP or pSUC2::GFP reporters, respectively. Genotypes are indicated. (A) and (B) Stage 3 floral meristems, (C) and (D), (K) and (L) Stage 2-III ovules. (E) to (H) Lateral root tip of 10-day seedling. (I) and (J), (M) Main root tip of 5-day seedling. (N) Stage 11 carpel tissue showing placenta and young stage 2-III ovules. (A) to (F) Free 2xGFP expression driven by the epidermis-specific *ML1* promoter. The diffuse gradient of GFP signal intensity



indicates movement of GFP from the epidermis to sub-epidermal tissue. Signal distribution does not noticeably differ between genotypes. **(A)** and **(B)** Note the epidermis-restricted localization of a nuclear pML1::NLS:GFP reporter (insets). **(G)** and **(H)**, Control using a nuclear localized GFP reporter (pML1::NLS:GFP). Note epidermis-specific signal. **(H)** Different optical section from root depicted in Fig. 6B. **(I)** to **(L)** Left panels: confocal micrographs, right panels: overlay with DIC channel. Free GFP expression driven by the *SUC2* promoter. Note unaltered diffusion from the metaphloem companion cells to the lateral cell layers. **(M)** and **(N)**, The *SUC2* promoter drives expression of a membrane-anchored GFP (tmGFP9). Signal marks the expression domain of the *SUC2* promoter in companion cells of the metaphloem. Abbreviations: DIC, differential interference contrast. Scale bars: 10  $\mu$ m.

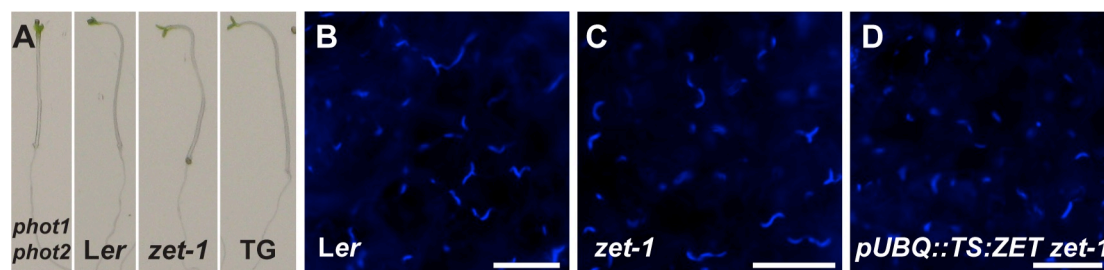

**Fig. S4. Phototropism and callose deposition assays.** **(A)** Phototropism assay. 3-days-old dark-grown seedlings were illuminated with blue light coming from the left. The *phot1 phot2* control plants lack the blue light receptor responsible for phototropism and are defective in the phototropism response (Christie et al., 1998). TG: *pUBQ::TS:ZET zet-1*. Phototropism appears normal in plants with altered *ZET* activity. **(B)** to **(D)** Cotyledon epidermis. Callose deposition upon addition of 1  $\mu$ M flg22 appears unaltered in plants with altered *ZET* activity. Scale bars: 50  $\mu$ m.

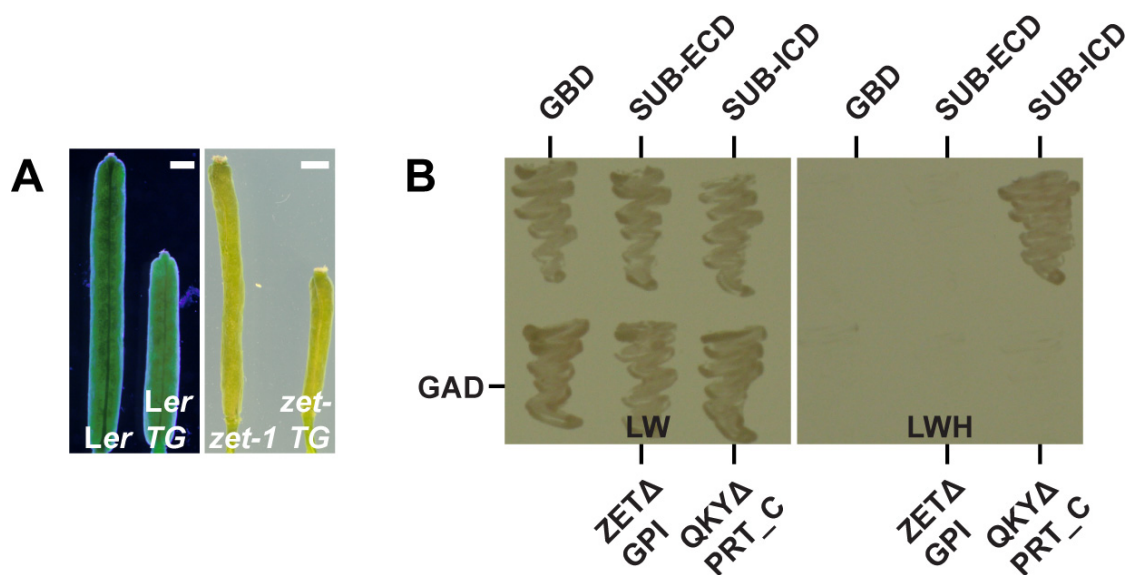

**Fig. S5. Analysis of *SUB* and *ZET* interactions.** (A) Plants ectopically expressing *SUB:EGFP* in *Ler* or *zet-1* exhibit comparably shorter siliques. Genotypes are indicated. Abbreviations: TG: *pUBQ::SUB:EGFP*. Scale bars: 1 mm. (B) Yeast two-hybrid assay involving a *ZET* variant lacking the GPI anchor addition domain (*ZETΔGPI*), a *QKY* variant, including all four C2 domains but lacking the *PRT\_C* domain (*QKYΔPRT\_C*) fused to the GAL4 activating domain (GAD) and the extracellular domain (ECD) or intracellular domain (ICD) of *SUB* fused to the GAL4 DNA-binding domain (GBD), respectively (Vaddepalli et al., 2014). Growth on –LW panel indicates successful transformation of both plasmids and on –LWH panel indicates presence or absence of interaction.

## Supplemental Tables

**Table S1.** Summary of *zet* alleles.

| Allele       | Mutagen                            | Mutation# | Amino acid change/transcript | Background | Reference                         |
|--------------|------------------------------------|-----------|------------------------------|------------|-----------------------------------|
| <i>zet-1</i> | EMS                                | T>Δ, 265  | S88--*                       | <i>Ler</i> | this study<br>Fulton et. al. 2009 |
| <i>zet-2</i> | T-DNA<br>Ds Transposon-<br>ET13436 | 193/LB    | M64--*                       | <i>Ler</i> | this study                        |

<sup>#</sup>the coordinates refer to the genomic sequence and relate to the ATG of *ZET* (At1g64760).

--\*indicates various aberrant sequences of residues followed by a stop.

**Table S2. Primers used in this study.**

| Primer Name               | Sequence (5'-3')                                |
|---------------------------|-------------------------------------------------|
| CER453151_F               | GCTCTGTTAGGTACGCCTTTTGTTACAAAC                  |
| CER453151_R               | GTGAGTAACGTGCATGTTGTTGGAATC                     |
| F13011_F                  | AGTGATTGGATGGTCGGTATG                           |
| F13011_R                  | TGGTTTTGGTGAGTTCTGCT                            |
| 530(TaqI)_F               | TCTGAATCTGAAACCACGACCAAGG                       |
| 530(TaqI)_R               | GGAGTCCACTCAGGTAACCTTTTCC                       |
| 840(ClaI)_F               | GCTGATGTATTGGATTTGAGTCGGT                       |
| 840(ClaI)_R               | AAGCCGAAGAGCCACAACAGGAAAT                       |
| ZETsense_Insitu_F         | TAATACGACTCACTATAGGGTCCCCAAAACCAAAA<br>AGTTTAC  |
| ZETsense_InsituM_R        | ATCTGTAAGCACTGCCTGCATTA                         |
| ZETas_Insitu_F            | TTCCCCAAAACCAAAAAGTTTAC                         |
| ZETas_InsituM_R           | TAATACGACTCACTATAGGGATCTGTAAGCACTGCC<br>TGCATTA |
| EGFP_sense_F              | TAATACGACTCACTATAGGGGTCGAGCTGGACGGC<br>GACGT    |
| EGFP_sense_R              | GCGCTTCTCGTTGGGGTCTTTGCTCAGGG                   |
| EGFP_as_F                 | GTCGAGCTGGACGGCGACGT                            |
| EGFP_as_R                 | TAATACGACTCACTATAGGGGCGCTTCTCGTTGGGG<br>TCTT    |
| PDCB1_EcoRI_F             | CCGAATTCTGGTGTGTGTGTAAGACAGGGC                  |
| PDCB1_XhoI_R              | TGCTCGAGGCTGTCTGTCGTGTAATCCGGG                  |
| ZETGH_EcoRI_F             | CCGAATTCTTGGGTGTGAATTGGGGAACAA                  |
| ZETX8_XhoI_R              | TGCTCGAGATTGCATTGTCCTTGAGATATA                  |
| ZET_Entry<br>clone_F_KpnI | TAGGTACCATGTCGAATCTGTTGGCTC TC                  |
| ZET_Entryclone_R_<br>XhoI | TAGACTCGAGTCAAAACATCATCCCTGATAAC                |
| ZET_NdeI_F (Y2H)          | TGCATATGTTGGGTGTGAATTGGGGAAC                    |
| ZET_EcoRI_R (Y2H)         | GAGAATTCATTGCATTGTCCTTGAGATA                    |
| ZETpro_F                  | ATGAGCTCTGATGGAGAGTAAGGAGAGG                    |
| ZETpro_R                  | TAACCGGTCGATTTTACCTGAGAAAGAT                    |
| ZET_EcoRI_F               | AGTGAATTCTTGGGTGTGAATTGGGGAA                    |
| ZET_BamHI_R               | TCAAGGACAATGCAATTTCCGGATCCAT                    |
| ZET F448*_F               | CAAGGACAATGCAATTGACCTATTCAGATTGTGG              |
| ZET F448*_R               | CCACAATCTGAATAGGTCAATTGCATTGTCCTTG              |



## Supplemental Materials and Methods

### Map-Based Cloning of *ZET*

To map the *ZET* locus at high resolution, an F2-mapping population was generated by outcrossing *zet-1* (*Ler*) to wild-type (*Col*). The F2 progeny were screened for *zet* individuals based on twisted inflorescence morphology. Genomic DNA was isolated and used for PCR-based amplification of molecular markers. The *zet-1* mutation was initially mapped to a single region on the lower arm of chromosome 1 between markers CER453151 and F13011. Further fine-mapping placed *zet-1* in a 138 kb interval between the two CAPS markers 530(*TaqI*) and 840(*Clal*). Candidate genes were analyzed by T-DNA insertion mutant analysis and/or sequence determination revealing that *zet-1* carries a mutation in At1g64760. A second *zet* mutant carrying a mutation in At1g64760 (*zet-2*) was identified in the Cold Spring Harbor GeneTrap Ds-transposon insertion line collection (Sundaresan et al., 1995). Finally, the mutant *zet-1* phenotype could be fully complemented by a construct encoding a T-Sapphire:ZET fusion protein driven by the native *ZET* promoter (pZET::TS:ZET) (Fig. 1).

### Supplemental References

- Christie, J. M., Reymond, P., Powell, G. K., Bernasconi, P., Raibekas, A. A., Liscum, E. and Briggs, W. R. (1998). Arabidopsis NPH1: a flavoprotein with the properties of a photoreceptor for phototropism. *Science* **282**, 1698-1701.
- Sundaresan, V., Springer, P., Volpe, T., Haward, S., Jones, J. D., Dean, C., Ma, H. and Martienssen, R. (1995). Patterns of gene action in plant development revealed by enhancer trap and gene trap transposable elements. *Genes Dev* **9**,

1797-1810.

**Vaddepalli, P., Herrmann, A., Fulton, L., Oelschner, M., Hillmer, S., Stratil, T.**

**F., Fastner, A., Hammes, U. Z., Ott, T., Robinson, D. G. et al. (2014).** The C2-domain protein QUIRKY and the receptor-like kinase STRUBBELIG localize to plasmodesmata and mediate tissue morphogenesis in *Arabidopsis thaliana*. *Development* **141**, 4139-4148.
